# Supplementary material for: Pattern randomness aftereffect
Source: PubMed Central journal article supplement — Sci Rep. 2013 Oct 11;3:2906. doi: 10.1038/srep02906 (PMC3795352; doi:10.1038/srep02906), 2013-10-11
Supplement: srep02906-s2.pdf [file srep02906-s2.pdf]

# **Pattern randomness aftereffect**

Yuki Yamada<sup>a,\*</sup>, Takahiro Kawabe<sup>b</sup>, & Makoto Miyazaki<sup>a</sup>

<sup>a</sup>Research Institute for Time Studies, Yamaguchi University, Yamaguchi, Yamaguchi, Japan

<sup>b</sup>Human Information Science Laboratory, NTT Communication Science Laboratories, Atsugi, Kanagawa, Japan

## **Supplementary Video legends**

*Supplementary Video.* A movie demonstration of the pattern randomness aftereffect.
